# Supplementary material for: Automating methods for estimating metabolite volatility
Source: Front Microbiol. 2023 Dec 14;14:1267234. doi: 10.3389/fmicb.2023.1267234 (PMC10755872; doi:10.3389/fmicb.2023.1267234)
Supplement: Supplementary Table 2 — Manual RVI database. [file Table_2.XLSX]

## Sheet: data
				group	Constant	Number of carbons	ketones	aldehydes	hydroxyl groups	carbox acids	peroxide	hydroperoxide	nitrate	nitro	c-c double bonds	rings	aromatic rings	phenol (OH on aromatic ring)	nitrophenol	nitroester	ester	ether (alicyclic)	ether, aromatic	amine primary	amine secondary	amine tertiary	amine aromatic		Volatility calculation:
				group (shorthand)	b0	nc	n=O	n=O	n OH	nC(O)OH	ROOR	ROOH	nNO3		nC=C	nr	nar	nOH_ring	nOH_ar		ester			amine_1	amine_2	amine_3	amine_ring
				group contribution term:	1.79	-0.44	-0.94	-1.35	-2.23	-3.58	-0.368	-2.48	-2.23	-2.15	-0.1	-0.01	-0.68	-2.14	0.04	-2.67	-1.2	-0.683	-1.03	-1.01	-0.85	-0.6	-1.61
compund ID	formula	name	mass																										log(alpha)	log Sum	RVI (log C*)
2-METHYL-BUTYRYL-COA	C26H40N7O17P3S	(2S)-2-methylbutanoyl-CoA	847.62		1.79	26	3		2				3		1	1						1		1	2		2		10.5	-32.13	-19.8
C00009	H3PO4	Phosphoric acid NIST	97.9952		1.79								1																9.61	-2.23	9.17
C00022	C3H4O3	Pyruvate	88.0621		1.79	3	1			1																			9.56	-5.84	5.51
C00024	C23H38N7O17P3S	Acetyl coenzyme A	809.571		1.79	23	2		2				3		1	1					1	1		1	2		2		10.5	-31.07	-18.76
C00025	C5H9NO4	Glutamate	147.129		1.79	5				2														1					9.79	-10.37	1.21
C00026	C5H6O5	2-Oxoglutarate;	146.098		1.79	5	1			2																			9.78	-10.3	1.27
C00031	C6H12O6	D-glucose 1	180.156		1.79	6			5							1						1							9.87	-14.48	-2.82
C00033	C2H4O2	Acetate	60.052		1.79	2				1																			9.4	-4.46	6.73
C00036	C4H4O5	Oxaloacetate	132.072		1.79	4	1			2																			9.74	-9.86	1.67
C00037	C2H5NO2	Glycine	75.0666		1.79	2				1														1					9.49	-5.47	5.81
C00041	C3H7NO2	Alanine	89.0932		1.79	3				1														1					9.57	-5.91	5.45
C00042	C4H6O4	Succinate	118.088		1.79	4				2																			9.69	-8.92	2.56
C00047	C6H14N2O2	L-Lysine;	146.188		1.79	6				1														2					9.78	-8.24	3.33
C00049	C4H7NO4	L-Aspartate	133.103		1.79	4				2														1					9.74	-9.93	1.6
C00058	CH2O2	Formate	46.0254		1.79	1				1																			9.28	-4.02	7.05
C00064	C5H10N2O3	Glutamine	146.144		1.79	5	1			1														2					9.78	-8.74	2.83
C00065	C3H7NO3	Serine	105.093		1.79	3			1	1														1					9.64	-8.14	3.29
C00068	C12H19N4O7P2S	Thiamin diphosphate	425.314		1.79	12							2		0	0	0							1	2	1	2		10.2	-16.27	-4.23
C00074	C3H5O6P	Phosphoenolpyruvate	168.042		1.79	3				1			1		1														9.84	-7.23	4.4
C00082	C9H11NO3	L-Tyrosine	181.189		1.79	9				1					3		1	1						1					9.88	-11.67	0
C00083	C24H38N7O19P3S	Malonyl-CoA	853.58		1.79	24	2		2	1			3		1	1					1	1		1	2		2		10.6	-35.09	-22.75
C00084	C2H4O	Acetaldehyde	44.0526		1.79	2		1																					9.26	-2.23	8.82
C00089	C12H22O11	Sucrose	342.296		1.79	12			8							2						3							10.2	-25.19	-13.25
C00090	C6H6O2	Catechol	110.111		1.79	6											1	2											9.66	-7.6	3.85
C00091	C25H40N7O19P3S	Succinyl-CoA	867.607		1.79	25	2		2	1			3		1	3					1	1		1	2		2		10.6	-35.55	-23.21
C00093	C3H9O6P	glycerol	172.074		1.79	3			2				1																9.85	-8.01	3.63
C00095	C6H12O6	Fructose	180.156		1.79	6			5													1							9.87	-14.47	-2.81
C00099	C3H7NO2	beta-Alanine	89.0932		1.79	3				1														1					9.57	-5.91	5.45
C00100	C24H40N7O17P3S	Propanoyl-CoA	823.597		1.79	24	2		2				3		1	3					1	1		1	2		2		10.5	-31.53	-19.21
C00109	C4H6O3	2-Oxobutanoate;	102.089		1.79	4	1			1																			9.63	-6.28	5.14
C00111	C3H7O6P	Glycerone phosphate	170.058		1.79	3	1		1				1																9.85	-6.72	4.92
C00114	C5H14NO	Choline	104.171		1.79	5			1																	1			9.64	-5.03	6.4
C00116	C3H8O3	Glycerol	92.0938		1.79	3			3																				9.58	-8.01	3.36
C00122	C4H4O4	Fumarate	116.072		1.79	4				2					1														9.68	-9.02	2.45
C00123	C6H13NO2	L-Leucine	131.173		1.79	6				1														1					9.74	-7.23	4.3
C00124	C6H12O6	Galactose	180.156		1.79	6			5													1							9.87	-14.47	-2.81
C00132	CH4O	Methanol	32.0419		1.79	1			1																				9.12	-2.67	8.24
C00137	C6H12O6	myo-inositol	180.156		1.79	6			6							1													9.87	-16.03	-4.37
C00141	C5H8O3	3-Methyl-2-oxobutanoic acid	116.115		1.79	5	1			1																			9.68	-6.72	4.75
C00146	C6H6O	Phenol	94.1112		1.79	6											1	1											9.59	-5.46	5.92
C00149	C4H6O5	(S)-Malate	134.087		1.79	4			1	2																			9.75	-11.15	0.39
C00152	C4H8N2O3	L-asparagine 2	132.118		1.79	4	1			1														2					9.74	-8.3	3.23
C00156	C7H6O3	4-Hydroxybenzoate	138.121		1.79	7				1							0	1										laura updated to not double count phenol and aromatic ring	9.76	-8.8	2.75
C00158	C6H8O7	citric acid	192.124		1.79	6			1	3																			9.9	-15.61	-3.92
C00159	C6H12O6	D-mannose 1	180.156		1.79	6			5							1						1							9.87	-14.48	-2.82
C00160	C2H4O3	Glycolate	76.0514		1.79	2			1	1																			9.5	-6.69	4.6
C00163	C3H6O2	Propanoate	74.0785		1.79	3				1			1																9.49	-7.13	4.15
C00164	C4H6O3	Acetoacetate	102.089		1.79	4	1			1																			9.63	-6.28	5.14
C00180	C7H6O2	Benzoate	122.121		1.79	7				1							1				1								9.71	-8.54	2.96
C00183	C5H11NO2	L-Valine;	117.146		1.79	5				1														1					9.69	-6.79	4.69
C00186	C3H6O3	(S)-Lactate	90.0779		1.79	3			1	1																			9.57	-7.13	4.23
C00188	C4H9NO3	L-Threonine	119.119		1.79	4			1	1														1					9.69	-8.58	2.9
C00207	C3H6O	acetone	58.0791		1.79	3	1																						9.38	-2.26	8.91
C00208	C12H22O11	Maltose	342.296		1.79	12			8							2						3							10.2	-25.19	-13.25
C00213	C3H7NO2	Sarcosine	89.0932		1.79	3				1															1				9.57	-5.75	5.61
C00218	CH5N	Methylamine	31.0571		1.79	1																		1					9.11	-1.45	9.45
C00222	C3H4O3	3-Oxopropanoate	88.0621		1.79	3		1		1																			9.56	-6.25	5.1
C00223	C30H42N7O18P3S	p-Coumaroyl-CoA	913.677		1.79	30	1		1	1			3		5	1	3	1			1	1		1	2		2		10.6	-39.14	-26.77
C00227	C2H5O5P	Acetyl phosphate	140.032		1.79	2	1						1																9.77	-4.05	7.51
C00230	C7H6O4	3,4-Dihydroxybenzoate	154.12		1.79	7				1							1	2											9.81	-11.62	-0.02
C00233	C6H10O3	4-Methyl-2-oxopentanoate;	130.142		1.79	6	1			1																			9.73	-7.16	4.36
C00243	C12H22O11	Lactose	342.296		1.79	12			8							2						3							10.2	-25.19	-13.25
C00251	C10H10O6	Chorismate	226.183		1.79	10				2					3		1	1					1						9.97	-15.71	-3.95
C00256	C3H6O3	(R)-Lactate	90.0779		1.79	3			1	1																			9.57	-7.13	4.23
C00258	C3H6O4	glyceric acid	106.077		1.79	3			2	1																			9.64	-9.36	2.07
C00261	C7H6O	Benzaldehyde	106.122		1.79	7		1									1												9.64	-5.11	6.32
C00263	C4H9NO3	L-Homoserine	119.119		1.79	4			1	1														1					9.69	-8.58	2.9
C00296	C7H12O6	quinic acid	192.167		1.79	7			4	1						1													9.9	-15.59	-3.9
C00322	C6H8O5	2-Oxoadipate;	160.125		1.79	6	1			2																			9.82	-10.74	0.87
C00332	C25H40N7O18P3S	Acetoacetyl-CoA	851.607		1.79	25	3		2				3		1	1					1	1		1	2		2		10.5	-32.89	-20.55
C00334	C4H9NO2	4-Aminobutyrate	103.12		1.79	4				1														1					9.63	-6.35	5.07
C00341	C10H20O7P2	Geranyl diphosphate	314.209		1.79	10							2		2														10.1	-9.06	2.85
C00353	C20H36O7P2	Geranylgeranyl diphosphate	450.443		1.79	20	0	0	0	0	0	0	2	0	4	0	0	0	0	0	0	0	0	0	0	0	0	diphosphate	10.3	-13.66	-1.6
C00379	C5H12O5	xylitol	152.146		1.79	5			5																				9.8	-13.35	-1.76
C00392	C6H14O6	Mannitol	182.172		1.79	6			6																				9.88	-16.02	-4.35
C00400	C10H20O	(-)-Menthol	156.265		1.79	10		0	1		0	0				1	0												9.81	-6.64	4.96
C00407	C6H13NO2	L-Isoleucine	131.173		1.79	6				1														1					9.74	-7.23	4.3
C00423	C9H8O2	trans-Cinnamate	148.159		1.79	9				1					4		1												9.79	-8.62	2.96
C00424	C3H6O2	(S)-Lactaldehyde	74.0785		1.79	3		1	1																				9.49	-4.9	6.38
C00441	C4H7NO3	L-Aspartate 4-semialdehyde	117.103		1.79	4		1		1														1					9.69	-7.7	3.78
C00448	C15H25O7P2	(2E,6E) - farnesyl diphosphate	382.326		1.79	15							2		3														10.2	-11.36	0.63
C00449	C11H20N2O6	N6-(L-1,3-Dicarboxypropyl)-L-lysine;	276.286		1.79	11				3														1	2				10.1	-18.29	-6.44
C00472	C6H4O2	Quinone - HMDB	108.095		1.79	6	2								2	1													9.65	-4.73	6.71
C00479	C3H6O	Propanal	58.0791		1.79	3		1																					9.38	-2.67	8.5
C00482	C11H12O5	4-hydroxycinnamic acid	224.21		1.79	11				1					7		1	1					2						9.97	-14	-2.24
C00492	C18H32O16	Raffinose-HMDB	504.437		1.79	18			11							3						5							10.3	-35.9	-23.78
C00497	C4H6O5	D-malic acid	134.087		1.79	4			1	2																			9.75	-11.15	0.39
C00512	C28H40N7O17P3S	Benzoyl-CoA	871.64		1.79	28											1												10.6	-13	-0.65
C00521	C10H16	(S)-Limonene	136.234		1.79	10		0			0	0			1	1	0												9.75	-4.51	7.03
C00530	C6H6O2	Hydroquinone	110.111		1.79	6			1								0	1										laura updated to not double count phenol and aromatic groups	9.66	-7.01	4.44
C00543	C2H7N	Dimethylamine	45.0837		1.79	2																			1				9.27	-1.73	9.33
C00544	C8H8O4	Homogentisate	168.147		1.79	8				1					3		1	2											9.84	-12.36	-0.73
C00546	C3H4O2	Methylglyoxal	72.0627		1.79	3	1	1																					9.48	-3.61	7.66
C00553	C10H20O	(+)-Neomenthol	156.265		1.79	10		0	1		0	0				1	0												9.81	-6.64	4.96
C00556	C7H8O	Benzyl alcohol	108.138		1.79	7			1								1												9.65	-5.99	5.45
C00565	C3H9N	Trimethylamine	59.1103		1.79	3																				1			9.39	-1.92	9.26
C00583	C3H8O2	Propane-1,2-diol	76.0944		1.79	3			2																				9.5	-5.78	5.51
C00587	C7H6O3	3-Hydroxybenzoate	138.121		1.79	7				1							1	1			1								9.76	-10.68	0.87
C00588	C5H15NO4P	O-Phosphocholine	184.151		1.79	5							1													1			9.88	-5.03	6.64
C00633	C7H6O2	4-Hydroxybenzaldehyde	122.121		1.79	7		1									1	1											9.71	-7.25	4.25
C00642	C8H8O3	4-Hydroxyphenylacetate	152.147		1.79	8				1					3		1	1											9.8	-10.22	1.37
C00666	C7H14N2O4	LL-2,6-Diaminoheptanedioate;	190.197		1.79	7				2														1					9.9	-11.25	0.44
C00670	C8H21NO6P	sn-Glycero-3-phosphocholine	258.229		1.79	8			2				1													1			10	-10.81	1.01
C00671	C6H10O3	(S)-3-Methyl-2-oxopentanoic acid	130.142		1.79	6	1			1																			9.73	-7.16	4.36
C00680	C7H14N2O4	meso-2,6-Diaminoheptanedioate;	190.197		1.79	7				2														2					9.9	-12.26	-0.57
C00682	C6H6O4	2-Hydroxymuconate semialdehyde	142.109		1.79	6		1	1	1					2														9.77	-10	1.56
C00683	C25H40N7O19P3S	(S)-Methylmalonyl-CoA	867.607		1.79	25	2		2	1			3		1	3					1	1		1	2		2		10.6	-35.55	-23.21
C00712	C18H34O2	oleic acid	282.461		1.79	18				1					1														10.1	-11.6	0.26
C00719	C5H11NO2	Betaine	117.146		1.79	5															1					1			9.69	-4	7.48
C00804	C3H2O2	Propynoate	70.0468		1.79	3				1			1																9.46	-7.13	4.12
C00808	C10H16O	(+)-Camphor	152.233		1.79	10	1	0			0	0				2													9.8	-5.36	6.23
C00811	C9H8O3	4-Coumarate	164.158		1.79	9				1					4		1	1											9.83	-10.76	0.86
C00827	C24H40N7O18P3S	Lactoyl-CoA	839.597		1.79	24	2		3				3		1	3					1	1		1	2		2		10.5	-33.76	-21.43
C00828	C16H16O2(C5H8)n	Menaquinone	649		1.79																								10.4	0	12.22
C00843	C10H18O	(-)-Menthone	154.249		1.79	10	1	0			0	0				1													9.81	-5.35	6.25
C00848	C10H16O2	6-Oxocineole	168.233		1.79	10	1	0			0	0				2						1							9.84	-6.04	5.59
C00859	C19H24O6	Gibberellin A1	348.39		1.79	19			2	1					1	4					1								10.2	-17.74	-5.79
C00885	C10H10O6	Isochorismate	226.183		1.79	10			1	2					3	1						1							9.97	-14.78	-3.02
C00894	C24H38N7O17P3S	Propenoyl-CoA	821.582		1.79	24	2		2				3		2	3					1	1		1	2		2		10.5	-31.63	-19.31
C00937	C3H6O2	(R)-Lactaldehyde	74.0785		1.79	3		1	1																				9.49	-4.9	6.38
C00956	C6H11NO4	L-2-Aminoadipate;	161.156		1.79	6				2														1					9.83	-10.81	0.81
C00964	C10H16O	(-)-trans-Carveol	152.233		1.79	10		0	1		0	0			2	1	0												9.8	-6.84	4.75
C01013	C3H6O3	3-Hydroxypropanoate	90.0779		1.79	3			1	1																			9.57	-7.13	4.23
C01026	C4H9NO2	N,N-Dimethylglycine	103.12		1.79	4				1																1			9.63	-5.94	5.48
C01035	C5H11N3O2	4-guanidinobutyric acid 2	145.16		1.79	5				1														1	2				9.78	-8.49	3.08
C01083	C12H22O11	Trehalose	342.296		1.79	12			8							2						3							10.2	-25.19	-13.25
C01089	C4H8O3	3-hydroxybutyric acid	104.105		1.79	4			1	1																			9.64	-7.57	3.86
C01123	C10H16O	(-)-trans-Isopiperitenol	152.233		1.79	10		0	1		0	0			2	1	0												9.8	-6.84	4.75
C01179	C9H8O4	3-(4-Hydroxyphenyl)pyruvate	180.157		1.79	9	1			1					3		1	1											9.87	-11.6	0.06
C01213	C25H40N7O19P3S	(R)-Methylmalonyl-CoA	867.607		1.79	25	2		2	1			3		1	3					1	1		1	2		2		10.6	-35.55	-23.21
C01235	C12H22O11	galactinol 2	342.296		1.79	12			9							2						2							10.2	-26.74	-14.79
C01251	C7H10O7	(R)-2-Hydroxybutane-1,2,4-tricarboxylate;	206.15		1.79	7			1	3																			9.93	-16.05	-4.33
C01380	C2H6O2	Ethylene glycol	62.0678		1.79	2			2																				9.41	-5.34	5.86
C01407	C6H6	Benzene	78.1118		1.79	6											1												9.51	-3.32	7.98
C01414	C20H32	Casbene	272.468		1.79	20									3	2													10.1	-9.12	2.72
C01433	C17H26O10	Loganin	390.382		1.79	17		0	5		0	0			1	3	0				1	3							10.2	-22.01	-10.01
C01455	C7H8	Toluene	92.1384		1.79	7											1												9.58	-3.76	7.61
C01467	C7H8O	3-Cresol	108.138		1.79	7											1	1											9.65	-5.9	5.54
C01468	C7H8O	4-Cresol	108.138		1.79	7											1	1											9.65	-5.9	5.54
C01500	C10H18O	Geraniol	154.249		1.79	10		0	1		0	0			2														9.81	-6.83	4.77
C01512	C16H24O10	Loganate	376.356		1.79	16		0	5	1	0	0			1	3	0					3							10.2	-23.95	-11.96
C01542	C7H8O	o-Cresol	108.138		1.79	7											1	1											9.65	-5.9	5.54
C01551	C4H6N4O3	Allantoin	158.115		1.79	4	3									1								1	3				9.82	-8.15	3.46
C01597	C16H22O10	Secologanate	374.34		1.79	16		1	4	1					2	2						3							10.2	-23.16	-11.18
C01606	C8H6O4	phthalic acid	166.131		1.79	8				2							1												9.84	-11.36	0.27
C01630	C10H18O9	1,4-D-xylobiose 1	282.245		1.79	10			6													3							10.1	-19.83	-7.97
C01699	C19H22O6	Gibberellin A3	346.374		1.79	19			1	1					2	3	1				1								10.2	-16.28	-4.33
C01765	C10H18O	(+)-Borneol	154.249		1.79	10		0	1		0	0				2													9.81	-6.65	4.95
C01767	C10H14O	(-)-Carvone	150.218		1.79	10	1	0			0	0			2	1	0												9.8	-5.55	6.04
C01845	C3H8O	Propan-2-ol	60.095		1.79	3			1																				9.4	-3.55	7.64
C01852	C17H24O10	Secologanin	388.366		1.79	17		1	4						2	2					1	3							10.2	-21.22	-9.22
C01957	C16H22O10	Secologanate	374.34		1.79	16	0	1	4	1	0	0			2	2	0												10.2	-21.11	-9.13
C01996	C7H16NO2	O-Acetylcholine	146.207		1.79	7															1					1			9.78	-4.88	6.69
C02034	C20H26O6	Gibberellin A19	362.417		1.79	20		1	1	2					1	4													10.2	-19.68	-7.71
C02035	C19H24O5	Gibberellin A20	332.391		1.79	19			1	1					1	4					1								10.1	-15.51	-3.58
C02057	C9H11NO2	Phenylalanine 2	165.189		1.79	9				1					3		1							1					9.84	-9.53	2.1
C02059	C31H46O2	Phylloquinone	450.696		1.79	31	2								5		2												10.3	-17.38	-5.32
C02124	C6H5ClO	4-Chlorophenol	128.556		1.79	6											1	1											9.73	-5.46	6.06
C02170	C4H6O4	Methylmalonate	118.088		1.79	4				2																			9.69	-8.92	2.56
C02204	C5H10O5	D-lyxose 2	150.13		1.79	5			4							1						1							9.8	-11.81	-0.23
C02222	C6H6O5	2-Maleylacetate	158.109		1.79	6	1		2						1														9.82	-8.14	3.47
C02225	C7H10O7	2-Methylcitrate	206.15		1.79	7			1	3																			9.93	-16.05	-4.33
C02226	C5H6O4	Citraconate	130.099		1.79	5				2					1														9.73	-9.46	2.06
C02236	C7H6O5S	4-Sulfobenzoate	202.185		1.79	7				1			1				1												9.92	-9.57	2.14
C02335	C24H41N8O17P3S	beta-Alanyl-CoA	838.612		1.79	24	2		2				3		1	3					1	1		2	2		2		10.5	-32.54	-20.21
C02344	C10H18O	(-)-endo-Fenchol	154.249		1.79	10		0	1		0	0				2													9.81	-6.65	4.95
C02375	C6H5ClO2	4-Chlorocatechol	144.556		1.79	6											1	2											9.78	-7.6	3.97
C02452	C10H16O	(-)-Perillyl alcohol	152.233		1.79	10		0	1		0	0			2	1	0												9.8	-6.84	4.75
C02462	C10H18O	Sabinene hydrate	154.249		1.79	10		0	1		0	0				2													9.81	-6.65	4.95
C02477	C29H50O2	alpha-Tocopherol	430.706		1.79	29									3	1	1	1				1							10.3	-16.57	-4.53
C02483	C28H48O2	gamma-Tocopherol	416.68		1.79	28									3	1	1	1				1							10.2	-16.13	-4.1
C02485	C10H14O	(-)-Isopiperitone	150.218		1.79	10	1								2	1													9.8	-5.55	6.04
C02488	C6H10O5	(R)-2-Ethylmalate	162.141		1.79	6			1	2																			9.83	-12.03	-0.41
C02502	C5H5NO	2-hydroxypyridine	95.0993		1.79	5									3		1	1								1			9.6	-5.92	5.47
C02504	C7H12O5	alpha-Isopropylmalate	176.167		1.79	7			1	2																			9.86	-12.47	-0.82
C02575	C6HCl5O	Pentachlorophenol	266.337		1.79	6											1	1											10	-5.46	6.37
C02612	C5H8O5	(R)-2-Methylmalate;	148.114		1.79	5			1	2																			9.79	-11.59	-0.01
C02625	C6H4Cl2O	2,4-Dichlorophenol	163.001		1.79	6											1	1											9.83	-5.46	6.16
C02631	C7H10O4	2-Isopropylmaleate	158.152		1.79	7				2					1														9.82	-10.34	1.27
C02632	C4H8O2	Isobutyrate	88.1051		1.79	4				1																			9.56	-5.34	6.01
C02730	C11H10O5	2-Succinylbenzoate	222.194		1.79	11	1			1					3		1												9.97	-10.34	1.42
C02814	C6H6O3	Benzene-1,2,4-triol	126.11		1.79	6											1	3											9.72	-9.74	1.77
C02876	C3H7O5P	Propanoyl phosphate	154.058		1.79	3															1								9.81	-2.52	9.08
C02923	C7H8O2	2,3-Dihydroxytoluene	124.137		1.79	7											1	2											9.71	-8.04	3.46
C02933	C6H4Cl2O2	3,5-Dichlorocatechol	179.001		1.79	6											1	2											9.87	-7.6	4.06
C02949	C28H40N7O18P3S	4-Hydroxybenzoyl-CoA	887.64		1.79	28	1		1	1			3		4	1	3	1			1	1		1	2		2		10.6	-38.16	-25.81
C03067	C7H6O2	3-Hydroxybenzaldehyde	122.121		1.79	7		1									1	1											9.71	-7.25	4.25
C03082	C4H8NO7P	4-Phospho-L-aspartate	213.083		1.79	4				1			1								1			1					9.95	-9.78	1.96
C03092	C10H18O2	6-endo-Hydroxycineole	170.249		1.79	10			1							2						1							9.85	-7.33	4.31
C03160	C32H44N7O20P3S	2-Succinylbenzoyl-CoA	971.713		1.79	32	2		1	2			3		4	1	3				1	1		1	2		2		10.6	-42.3	-29.91
C03190	C10H20O7P2	(+)-Bornyl diphosphate	314.209		1.79	10							2			1						1							10.1	-9.55	2.35
C03248	C4H2O4	Acetylenedicarboxylate	114.056		1.79	4				2					2													triple bond	9.68	-9.12	2.35
C03313	C31H48O2	Phylloquinol	452.712		1.79	31									6		2	2											10.3	-19.88	-7.82
C03351	C7H8O2	3-Hydroxybenzyl alcohol	124.137		1.79	7			1								1	1											9.71	-8.13	3.37
C03434	C6H2Cl4O2	Tetrachlorohydroquinone	247.891		1.79	6											1	2											10	-7.6	4.2
C03451	C13H21N3O8S	(R)-S-Lactoylglutathione	379.386		1.79	13	2		1	2											1			1	2			amides = ketone + amine	10.2	-20.9	-8.91
C03572	C6H5ClO4	2-Chloro-cis,cis-muconate	176.554		1.79	6				2					2														9.87	-10	1.66
C03579	C19H24O7	Gibberellin A8	364.39		1.79	19			3	1					1	4					1								10.2	-19.97	-8
C03585	C6H5ClO4	3-Chloro-cis,cis-muconate	176.554		1.79	6				2					2														9.87	-10	1.66
C03657	C11H8O4	1,4-Dihydroxy-2-naphthoate	204.179		1.79	11				1					5		2	2											9.93	-14.56	-2.84
C03664	C8H6Cl2O3	2,4-Dichlorophenoxyacetate	221.037		1.79	8				1							1					1							9.96	-8.46	3.29
C03871	C7H11NO5	L-2-Amino-6-oxoheptanedioate;	189.166		1.79	7	1			2														1					9.9	-12.19	-0.5
C03918	C6H4Cl2O4	2,4-Dichloro-cis,cis-muconate	211		1.79	6				2					2														9.94	-10	1.73
C03964	C9H10O4	(R)-3-(4-Hydroxyphenyl)lactate	182.173		1.79	9			1	1					3		1	1											9.88	-12.89	-1.22
C03972	C7H9NO4	2,3,4,5-Tetrahydrodipicolinate	171.151		1.79	7				2						1										1			9.85	-10.85	0.79
C03981	C4H4O5	2-Hydroxyethylenedicarboxylate	132.072		1.79	4			1	2					1														9.74	-11.25	0.28
C03993	C13H16O8	4-(beta-D-Glucosyloxy)benzoate	300.261		1.79	13			4	1					3	1	1					1	1						10.1	-20.92	-9.04
C04002	C7H8O6	(Z)-But-1-ene-1,2,4-tricarboxylate;	188.135		1.79	7				3					1														9.89	-13.92	-2.24
C04076	C6H11NO3	L-2-Aminoadipate 6-semialdehyde;	145.156		1.79	6		1		1														1					9.78	-8.58	2.99
C04091	C6H8O2	cis-1,2-Dihydrobenzene-1,2-diol**	112.126		1.79	6			2						2	1													9.67	-7.31	4.15
C04112	C7H8O4	3-Methyl-cis,cis-hexadienedioate	156.136		1.79	7				2					2														9.81	-10.44	1.16
C04145	C45H76O7P2	all-trans-Nonaprenyl diphosphate	791.028		1.79	45							2		2														10.5	-24.46	-12.15
C04181	C5H8O4	3-Hydroxy-3-methyl-2-oxobutanoic acid	132.115		1.79	5	1		1	1																			9.74	-8.95	2.58
C04225	C7H8O6	(Z)-But-2-ene-1,2,3-tricarboxylate	188.135		1.79	7				3					1														9.89	-13.92	-2.24
C04236	C7H10O5	(2S)-2-Isopropyl-3-oxosuccinate	174.151		1.79	7	1			2																			9.86	-11.18	0.47
C04272	C5H10O4	(R)-2,3-Dihydroxy-3-methylbutanoate	134.131		1.79	5			2	1																			9.75	-10.24	1.3
C04390	C9H16N2O5	N6-Acetyl-LL-2,6-diaminoheptanedioate;	232.234		1.79	9	1			2														1	1				9.98	-13.92	-2.15
C04411	C7H12O5	(2R,3S)-3-Isopropylmalate	176.167		1.79	7			1	2																			9.86	-12.47	-0.82
C04421	C11H18N2O7	N-Succinyl-LL-2,6-diaminoheptanedioate;	290.27		1.79	11	1			3														1	1				10.1	-18.38	-6.51
C04431	C6H4O4	cis-4-Carboxymethylenebut-2-en-4-olide	140.094		1.79	6				1					2	1					1								9.77	-7.63	3.93
C04433	C10H18O2	(E)-3,7-Dimethylocta-1,6-diene-3,8-diol	170.249		1.79	10			2						2														9.85	-9.06	2.58
C04462	C11H15NO8	N-Succinyl-2-L-amino-6-oxoheptanedioate;	289.239		1.79	11	2			3															1				10.1	-18.31	-6.44
C04522	C6H5ClO4	2-Chloro-2,5-dihydro-5-oxofuran-2-acetate	176.554		1.79	6				1					1	1					1								9.87	-7.53	4.13
C04558	C7H8O4	3-Methylmuconolactone	156.136		1.79	7	1			1					1														9.81	-7.7	3.9
C04559	C7H8O4	4-Methylmuconolactone	156.136		1.79	7	1			1					1														9.81	-7.7	3.9
C04592	C7H10O2	Toluene-cis-dihydrodiol	126.153		1.79	7											1	2											9.72	-8.04	3.47
C04593	C7H10O7	(2S,3R)-3-Hydroxybutane-1,2,3-tricarboxylate	206.15		1.79	7			1	3																			9.93	-16.05	-4.33
C04706	C6H3ClO4	cis-2-Chloro-4-carboxymethylenebut-2-en-1,4-olide	174.539		1.79	6				1					2	1					1								9.86	-7.63	4.02
C04718	C10H16O3	1,6,6-Trimethyl-2,7-dioxabicyclo[3.2.2]nonan-3-one	184.232		1.79	10										2					1	1							9.88	-6.3	5.37
C04729	C6H3ClO4	trans-2-Chloro-4-carboxymethylenebut-2-en-1,4-olide	174.539		1.79	6				1					2	1					1								9.86	-7.63	4.02
C04877	C35H55N7O26P2	UDP-N-acetylmuramoyl-L-alanyl-gamma-D-glutamyl-meso-2,6-diaminopimelate	1051.79		1.79																								10.6	0	12.43
C04882	C41H65N9O28P2	UDP-N-acetylmuramoyl-L-alanyl-D-glutamyl-6-carboxy-L-lysyl-D-alanyl-D-alanine;	1193.95		1.79																								10.7	0	12.49
C05125	C14H23N4O8P2S	2-(alpha-Hydroxyethyl)thiamine diphosphate	469.367		1.79	14			1				2		2	1						1			1	1	1		10.3	-16.8	-4.72
C05235	C3H6O2	Hydroxyacetone	74.0785		1.79	3	1		1																				9.49	-4.49	6.79
C05247	C20H42O7P2	Phytyl diphosphate	456.491		1.79	20							2		1														10.3	-13.36	-1.29
C05427	C20H42O7P2	Phytyl diphosphate	456.491		1.79	20							2		1														10.3	-13.36	-1.29
C05535	C6H10NO3SR	alpha-Aminoadipoyl-S-acyl enzyme;	176.21		1.79																								9.86	0	11.65
C05539	C9H13NO6	N-Acetyl-L-2-amino-6-oxopimelate;	231.203		1.79	9	2			2															1				9.98	-13.85	-2.08
C05560	C16H23N6O10P	L-2-Aminoadipate adenylate;	490.362		1.79	16			2	1			1		1						1	1		2			2		10.3	-24.53	-12.43
C05618	C6H5ClO2	3-Chlorocatechol	144.556		1.79	6											1	2											9.78	-7.6	3.97
C05662	C7H10O7	Homoisocitrate	206.15		1.79	7			1	3																			9.93	-16.05	-4.33
C05668	C24H40N7O18P3S	3-Hydroxypropionyl-CoA	839.597		1.79	24	2		3				3		1	3					1	1		1	2		2		10.5	-33.76	-21.43
C05817	C11H12O6	(1R,6R)-6-Hydroxy-2-succinylcyclohexa-2,4-diene-1-carboxylate	240.209		1.79	11	1		1	2					2	1													10	-15.38	-3.59
C05819	C16H18O2(C5H8)n	Menaquinol	310.4		1.79																								10.1	0	11.9
C05847	C5H12O7P2(C5H8)n	all-trans-Polyprenyl diphosphate	320		1.79																								10.1	0	11.91
C05848	C12H14O3(C5H8)n	4-Hydroxy-3-polyprenylbenzoate	274		1.79	17				1					5		1	1											10.1	-14.38	-2.53
C05849	C31H46O3	Vitamin K1 epoxide	466.695		1.79	31	2								4	2	1					1							10.3	-17.3	-5.23
C05979	C3H8O	Propane-1-ol	60.095		1.79	3			1																				9.4	-3.55	7.64
C05983	C13H18N5O8P	Propionyladenylate	403.284		1.79	13			2				1		1	3					1	1		1		4			10.2	-17.83	-5.82
C05984	C4H8O3	2-Hydroxybutanoic acid	104.105		1.79	4			1	1																			9.64	-7.57	3.86
C05989	C24H38N7O18P3S	3-Oxopropionyl-CoA	837.581		1.79	24	2	1	2				3		1	3					1	1		1	2		2		10.5	-32.88	-20.55
C05993	C12H16N5O8P	Acetyl adenylate	389.258		1.79	12	1		2				1		1	1						1		1			2		10.2	-17.93	-5.93
C05994	C7H12O5	2-Propylmalate	176.167		1.79	7			1	2																			9.86	-12.47	-0.82
C06002	C4H6O3	(S)-Methylmalonate semialdehyde	102.089		1.79	4		1		1																			9.63	-6.69	4.73
C06006	C6H10O4	(S)-2-Aceto-2-hydroxybutanoate	146.141		1.79	6	1		1	1																			9.78	-9.39	2.18
C06007	C6H12O4	(R)-2,3-Dihydroxy-3-methylpentanoate	148.157		1.79	6			2	1																			9.79	-10.68	0.9
C06010	C5H8O4	(S)-2-Acetolactate	132.115		1.79	5	1		1	1																			9.74	-8.95	2.58
C06032	C5H8O5	D-erythro-3-Methylmalate	148.114		1.79	5			1	2																			9.79	-11.59	-0.01
C06066	C10H16O3	4,5-Dihydro-5,5-dimethyl-4-(3-oxobutyl)furan-2(3H)-one	184.232		1.79	10	1									1					1								9.88	-6.55	5.12
C06070	C10H14O3	Irodotrial	182.216		1.79	10		2	1						1	1													9.88	-9.44	2.23
C06071	C17H26O9	Deoxyloganin	374.383		1.79	17			4						1	3					1	3							10.2	-19.78	-7.8
C06074	C10H16	Myrcene	136.234		1.79	10									3														9.75	-4.7	6.84
C06086	C20H32	Pimaradiene	272.468		1.79	20									2	3													10.1	-9.03	2.81
C06087	C20H30O2	Abietic acid	302.451		1.79	20				1					2	3													10.1	-12.61	-0.72
C06088	C20H34O4	Aphidicolin	338.482		1.79	20			4							3													10.1	-17.75	-5.81
C06089	C20H36O7P2	ent-Copalyl diphosphate	450.443		1.79	20							2		2	2												Hydroxyls on P groups	10.3	-13.48	-1.42
C06090	C20H32	ent-Kaurene	272.468		1.79	20									1	4													10.1	-8.94	2.9
C06091	C34H47NO11	Aconitine	645.737		1.79	34			3						3	4	1				2	4				1		3 ester instead of 4?	10.4	-28.4	-16.18
C06092	C22H33NO2	Veatchine	343.503		1.79	22			1						1	4						1				1		Ether not on ring?	10.2	-13.33	-1.39
C06093	C20H28O3	Gibberellin A12 aldehyde	316.435		1.79	20		1		1					1	4													10.1	-13.87	-1.96
C06094	C20H28O5	Gibberellin A53	348.433		1.79	20			1	2					1	4													10.2	-18.33	-6.38
C06095	C20H28O6	Gibberellin A44 diacid	364.433		1.79	20			2	2					1	4													10.2	-20.56	-8.59
C06096	C19H24O6	Gibberellin A29	348.39		1.79	19			2	1					1	4					1								10.2	-17.74	-5.79
C06099	C10H16	(R)-Limonene	136.234		1.79	10									2	1													9.75	-4.61	6.93
C06153	C6H12O6	scyllo-inositol	180.156		1.79	6			6							1													9.87	-16.03	-4.37
C06304	C10H16	(+)-Camphene	136.234		1.79	10									1	1													9.75	-4.51	7.03
C06305	C10H16	(-)-Camphene	136.234		1.79	10									1	1													9.75	-4.51	7.03
C06307	C10H16	(-)-beta-Pinene	136.234		1.79	10									1	1													9.75	-4.51	7.03
C06308	C10H16	(-)-alpha-Pinene	136.234		1.79	10									1	1													9.75	-4.51	7.03
C06328	C6H5ClO3	6-Chlorobenzene-1,2,4-triol	160.555		1.79	6											1	3											9.82	-9.74	1.87
C06329	C6H5ClO5	2-Chloromaleylacetate	192.554		1.79	6	1			2					1														9.9	-10.84	0.85
C06400	C12H22O11(C6H10O5)n	D- trehalose	342.3		1.79	18																							10.2	-7.92	4.02
C06594	C6H3Cl3	1,2,4-Trichlorobenzene	181.447		1.79	6											1												9.88	-3.32	8.35
C06596	C6H5Cl5	gamma-Pentachlorocyclohexene	254.369		1.79	6									1	1													10	-2.75	9.06
C06597	C6H4Cl4	1,3,4,6-Tetrachloro-1,4-cyclohexadiene	217.908		1.79	6									2	1													9.96	-2.85	8.9
C06598	C6H5Cl3O	2,4,5-Trichloro-2,5-cyclohexadiene-1-ol	199.462		1.79	6			1						2	1													9.92	-5.08	6.63
C06599	C6H6Cl2O2	2,5-Dichloro-2,5-cyclohexadiene-1,4-diol	181.017		1.79	6			2						2	1													9.88	-7.31	4.36
C06600	C6H4Cl2O2	2,5-Dichlorohydroquinone	179.001		1.79	6											1	2											9.87	-7.6	4.06
C06601	C6H5ClO2	Chlorohydroquinone	144.556		1.79	6											1	2											9.78	-7.6	3.97
C06602	C6H4Cl2O	2,5-Dichlorophenol	163.001		1.79	6											1	1											9.83	-5.46	6.16
C06603	C6H6O4	cis,cis-4-Hydroxymuconic semialdehyde	142.109		1.79	6		1	1	1					2														9.77	-10	1.56
C06672	C8H8O4	4-hydroxy-3-methoxybenzoic acid	168.147		1.79	8				1					3		1	1					1						9.84	-11.25	0.38
C06677	C7H8O3S	Toluene-4-sulfonate	172.202		1.79	7							1				1												9.85	-5.99	5.65
C06678	C7H8O4S	4-Sulfobenzyl alcohol	188.201		1.79	7			1				1				1												9.89	-8.22	3.46
C06679	C7H6O4S	4-Sulfobenzaldehyde	186.185		1.79	7		1					1				1												9.89	-7.34	4.34
C06730	C7H8O2	4-Methylcatechol	124.137		1.79	7											1	2											9.71	-8.04	3.46
C06755	C2H3ClO2	Chloroacetic acid	94.497		1.79	2				1																			9.59	-4.46	6.92
C06986	C11H8O4	Spirodilactone	204.179		1.79	11									3	2	1				2								9.93	-8.24	3.48
C06988	C6H6Cl6	beta-1,2,3,4,5,6-Hexachlorocyclohexane	290.83		1.79	6										1													10.1	-2.65	9.22
C06989	C6H6Cl4	delta-3,4,5,6-Tetrachlorocyclohexene	219.924		1.79	6									1	1													9.96	-2.75	9
C06990	C6H5Cl	Chlorobenzene	112.557		1.79	6											1												9.67	-3.32	8.14
C07064	C12H22O11	Lactulose	342.296		1.79	12			8							2						3							10.2	-25.19	-13.25
C07075	C6H6Cl6	Lindane	290.83		1.79	6										1													10.1	-2.65	9.22
C07088	C8H7ClO3	4-Chlorophenoxyacetate	186.592		1.79	8				1							1					1							9.89	-8.46	3.22
C07089	C6H5ClO4	5-Chloro-2-hydroxymuconic semialdehyde	176.554		1.79	6		1	1	1					2														9.87	-10	1.66
C07090	C5H4O2	Protoanemonin	96.0841		1.79	5									2	1					1								9.6	-3.61	7.78
C07091	C5H6O3	cis-Acetylacrylate	114.099		1.79	5	1			1					1														9.68	-6.82	4.65
C07092	C6H4Cl2	1,4-Dichlorobenzene	147.002		1.79	6											1												9.79	-3.32	8.26
C07093	C6H6Cl2O2	3,6-Dichloro-cis-1,2-dihydroxycyclohexa-3,5-diene**	181.017		1.79	6			2						2	1													9.88	-7.31	4.36
C07094	C6H4Cl2O2	3,6-Dichlorocatechol	179.001		1.79	6											1	2											9.87	-7.6	4.06
C07095	C6H4Cl2O4	2,5-Dichloro-cis,cis-muconate	211		1.79	6				2					2														9.94	-10	1.73
C07096	C6H4Cl2O	Dichlorophenol	163.001		1.79	6											1	1											9.83	-5.46	6.16
C07097	C6H4Cl2O2	2,6-Dichlorohydroquinone	179.001		1.79	6											1	2											9.87	-7.6	4.06
C07098	C6H3Cl3O	2,4,6-Trichlorophenol	197.446		1.79	6											1	1											9.91	-5.46	6.24
C07099	C6H3Cl3O2	2,3,6-Trichlorohydroquinone	213.446		1.79	6											1	2											9.95	-7.6	4.14
C07100	C8H5Cl3O3	2,4,5-Trichlorophenoxyacetic acid	255.482		1.79	8				1							1					1							10	-8.46	3.35
C07101	C6H3Cl3O	2,4,5-Trichlorophenol	197.446		1.79	6											1	1											9.91	-5.46	6.24
C07102	C6H5ClO3	5-Chloro-1,2,4-trihydroxybenzene	160.555		1.79	6											1	3											9.82	-9.74	1.87
C07103	C6H4O3	2-Hydroxy-1,4-benzoquinone	124.094		1.79	6	2		1						2	1													9.71	-6.96	4.54
C07394	C47H51NO14	Paclitaxel	853.906		1.79	47	2		3						10	4	3				4			1					10.6	-38.14	-25.8
C08243	C18H32O16	D--melezitose	504.437		1.79	18			11							3						5							10.3	-35.9	-23.78
C09092	C20H30O	Ferruginol	286.452		1.79	20			1						3	2	1												10.1	-12.03	-0.16
C09094	C20H34O	Geranylgeraniol	290.483		1.79	20			1						4														10.1	-11.43	0.44
C09118	C20H30O2	Isopimaric acid	302.451		1.79	20				1					2	3													10.1	-12.61	-0.72
C09163	C20H28O3	Pisiferic acid	316.435		1.79	20			1	1					3	2	1												10.1	-15.61	-3.7
C09183	C20H36O2	Sclareol	308.499		1.79	20			2						1	2													10.1	-13.38	-1.48
C09541	C19H21NO4	porphine 1	327.374		1.79	3									6	2	2	2					2			1			10.1	-10.24	1.68
C09727	C15H14O6	Epicatechin	290.268		1.79	15			1						6	1	2	4				1							10.1	-20.04	-8.17
C09769	C18H22O11	Asperuloside	414.361		1.79	18			4						2	4					2	4							10.2	-22.21	-10.19
C09804	C10H16O2	cis-trans-Nepetalactol	168.233		1.79	10			1						1	2						1							9.84	-7.43	4.2
C09816	C11H12O4	Benzylsuccinate	208.211		1.79	32				2							1												9.94	-21.92	-10.19
C09819	C32H46N7O20P3S	(Hydroxymethylphenyl)succinyl-CoA	973.729		1.79	32		1	1	1																			10.6	-21.24	-8.84
C09820	C32H44N7O20P3S	Benzoylsuccinyl-CoA	971.713		1.79	32	1			1							1												10.6	-19.28	-6.88
C09844	C10H18O	1,8-Cineole	154.249		1.79	10		0			0	0				2						1							9.81	-5.1	6.49
C09893	C10H16O	Pulegone	152.233		1.79	10	1	0			0	0			1	1													9.8	-5.45	6.14
C10792	C16H22O2	Geranylhydroquinone	246.345		1.79	16									5		1	2											10	-12.5	-0.7
C10793	C16H22O2	Geranylhydroquinone	246.345		1.79	16									5		1	2											10	-12.5	-0.7
C10906	C6H12O6	fructose 2	180.156		1.79	6	1		5																				9.87	-14.73	-3.07
C11352	C6H6Cl2	5,6-Dichloro-1,3-cyclohexadiene**	149.018		1.79	6									2	1													9.79	-2.85	8.73
C11383	C10H14O	(+)-(S)-Carvone	150.218		1.79	10	1	0			0	0			1		1												9.8	-6.12	5.47
C11388	C10H18O	(-)-Linalool	154.249		1.79	10		0	1		0	0			2														9.81	-6.83	4.77
C11389	C10H18O	(+)-Linalool	154.249		1.79	10			1						2														9.81	-6.83	4.77
C11393	C10H18O	(-)-alpha-Terpineol	154.249		1.79	10		0	1		0	0					1												9.81	-7.31	4.29
C11409	C10H16O	(+)-trans-Carveol	152.233		1.79	10		0	1		0	0			1		1												9.8	-7.41	4.18
C11636	C16H24O9	7-Deoxyloganate	360.356		1.79	16		0	2	1	0	0				2	1												10.2	-15.78	-3.81
C11672	C16H22O9	10-Deoxygeniposidic acid	358.341		1.79	16		0	2	1	0	0				2	1												10.2	-15.78	-3.82
C11673	C16H22O10	Geniposidic acid	374.34		1.79	16		0	2	1	0	0				2	1												10.2	-15.78	-3.8
C11700	C29H36O10	10-Deacetylbaccatin III	544.59		1.79	29	1		4						4	4	1				2							esters	10.4	-26.14	-14
C11853	C20H28O4	Gibberellin A14 aldehyde	332.434		1.79	20		1	1	1					1	4													10.1	-16.1	-4.17
C11854	C19H22O5	Gibberellin A51-catabolite	330.375		1.79	19	1			2					2	3	1												10.1	-17.37	-5.44
C11855	C19H22O6	Gibberellin A29-catabolite	346.374		1.79	19	1		1	2					2	4													10.2	-18.93	-6.98
C11857	C20H28O4	Gibberellin A12	332.434		1.79	20				2					1	4													10.1	-16.1	-4.17
C11858	C20H28O5	Gibberellin A14	348.433		1.79	20			1	2					1	4													10.2	-18.33	-6.38
C11859	C20H28O6	Gibberellin A37 open lactone	364.433		1.79	20			2	2					1	4													10.2	-20.56	-8.59
C11860	C20H28O5	Gibberellin A15 open lactone	348.433		1.79	20			1	2					1	4													10.2	-18.33	-6.38
C11861	C20H26O5	Gibberellin A24	346.417		1.79	20		1		2					1	4													10.2	-17.45	-5.5
C11862	C20H26O6	Gibberellin A36	362.417		1.79	20		1	1	2					1	4													10.2	-19.68	-7.71
C11863	C19H24O4	Gibberellin A9	316.392		1.79	19				1					1	4					1								10.1	-13.28	-1.37
C11864	C19H24O5	Gibberellin A4	332.391		1.79	19			1	1					1	4					1	1						ethers double counted on ester?	10.1	-16.19	-4.26
C11865	C19H24O5	Gibberellin A51	332.391		1.79	19			1	1					1	4					1								10.1	-15.51	-3.58
C11866	C19H22O4	2,3-Dehydro-gibberellin A9	314.376		1.79	19				1					2	4					1								10.1	-13.38	-1.47
C11867	C19H22O5	Gibberellin A7	330.375		1.79	19			1	1					2	4					1								10.1	-15.61	-3.68
C11868	C19H24O6	Gibberellin A34	348.39		1.79	19			2	1					1	4					1								10.2	-17.74	-5.79
C11869	C19H22O6	Gibberellin A34-catabolite	346.374		1.79	19	1		1	2					2	4													10.2	-18.93	-6.98
C11870	C19H22O7	Gibberellin A8-catabolite	362.374		1.79	19	1		2	2					2	4													10.2	-21.16	-9.19
C11871	C19H22O5	Gibberellin A5	330.375		1.79	19			1	1					2	4					1								10.1	-15.61	-3.68
C11872	C20H32O	Kaur-16-en-18-ol	288.467		1.79	20			1						1	4													10.1	-11.17	0.7
C11873	C20H30O	Kaur-16-en-18-al	286.452		1.79	20		1							1	4													10.1	-10.29	1.58
C11874	C20H30O2	Kaur-16-en-18-oic acid	302.451		1.79	20				1					1	4													10.1	-12.52	-0.63
C11875	C20H30O3	ent-7alpha-Hydroxykaur-16-en-19-oic acid	318.45		1.79	20			1	1					1	4													10.1	-14.75	-2.84
C11876	C20H30O4	6beta,7beta-Dihydroxykaurenoic acid	334.45		1.79	20			2	1					1	4													10.1	-16.98	-5.05
C11877	C20H32	(+)-Sandaracopimaradiene	272.468		1.79	20									2	3													10.1	-9.03	2.81
C11878	C20H32	(-)-Abietadiene	272.468		1.79	20									2	3													10.1	-9.03	2.81
C11879	C20H32	Levopimaradiene	272.468		1.79	20									2	3													10.1	-9.03	2.81
C11880	C20H32	Neoabietadiene	272.468		1.79	20									2	3													10.1	-9.03	2.81
C11881	C20H32	Palustradiene	272.468		1.79	20									2	3													10.1	-9.03	2.81
C11882	C20H32O	Abietinol	288.467		1.79	20			1						2	3													10.1	-11.26	0.61
C11883	C20H32O	Levopimarinol	288.467		1.79	20			1						2	3													10.1	-11.26	0.61
C11884	C20H32O	Neoabietinol	288.467		1.79	20			1						2	3													10.1	-11.26	0.61
C11885	C20H30O	Neoabietal	286.452		1.79	20		1							2	3													10.1	-10.38	1.49
C11886	C20H30O	Levopimarinal	286.452		1.79	20		1							2	3													10.1	-10.38	1.49
C11887	C20H30O	Abietal	286.452		1.79	20		1							2	3													10.1	-10.38	1.49
C11888	C20H30O2	Levopimaric acid	302.451		1.79	20				1					2	3													10.1	-12.61	-0.72
C11889	C20H30O2	Neoabietic acid	302.451		1.79	20				1					2	3													10.1	-12.61	-0.72
C11890	C20H34O	Aphidicolan-16beta-ol	290.483		1.79	20			1							3													10.1	-11.06	0.81
C11893	C20H32	Cembrene	272.468		1.79	20									4	1													10.1	-9.21	2.63
C11894	C20H32	Taxa-4(5)	272.468		1.79	20									2	3													10.1	-9.03	2.81
C11895	C20H32O	Taxa-4 (20)	288.467		1.79	20			1						2	3													10.1	-11.26	0.61
C11896	C22H34O2	Taxa-4(20),11(12)-dien-5alpha-yl acetate	330.504		1.79	22									2	3					1								10.1	-11.11	0.82
C11897	C20H32O2	Taxa-4(20),11(12)-dien-5alpha	304.467		1.79	20			2						2	3													10.1	-13.49	-1.6
C11898	C22H34O3	Taxa-4(20),11(12)-dien-5alpha-acetoxy-10beta-ol	346.504		1.79	22			1						2	3					1								10.2	-13.34	-1.39
C11899	C22H32O9	10-Deacetyl-2-debenzoylbaccatin III	440.484		1.79	22	2		5						2	3													10.3	-22.94	-10.89
C11900	C31H38O11	Baccatin III	586.627		1.79	31	1		3						4	4	1				3								10.4	-25.99	-13.81
C11901	C20H36O7P2	Copalyl diphosphate	450.443		1.79	20							2		2	2												Hydroxyls	10.3	-13.48	-1.42
C11902	C20H36O7P2	9alpha-Copalyl diphosphate	450.443		1.79	20							2		2	2												Hydroxyls	10.3	-13.48	-1.42
C11905	C20H28O4	Gibberellin A53 aldehyde	332.434		1.79	20		1	1	1					1	4													10.1	-16.1	-4.17
C11951	C10H16O	(+)-cis-Isopulegone	152.233		1.79	10	1								1	1													9.8	-5.45	6.14
C11952	C10H18O	(+)-Isomenthone	154.249		1.79	10	1									1													9.81	-5.35	6.25
C12077	C20H30O2	Palustric acid	302.451		1.79	20				1					2	3													10.1	-12.61	-0.72
C12831	C6H3Cl3O2	3,4,6-Trichlorocatecho	213.446		1.79	6											1	2											9.95	-7.6	4.14
C12832	C6H5Cl3O2	3,4,6-Trichloro-cis-1,2-dihydroxycyclohexa-3,5-diene	215.462		1.79	6			2						2	1													9.95	-7.31	4.43
C12833	C6H3Cl3O4	2,3,5-Trichloro-cis,cis-muconate	245.445		1.79	6				2					2														10	-10	1.8
C12834	C6H2Cl2O4	2,5-Dichloro-carboxymethylenebut-2-en-4-olide	208.984		1.79	6				1					2	1					1								9.94	-7.63	4.1
C12835	C6H4Cl2O5	2,5-Dichloro-4-oxohex-2-enedioate	226.999		1.79	6	1			2					1														9.97	-10.84	0.92
C12836	C6H7ClO5	2-Chloro-3-oxoadipate	194.57		1.79	6	1			2																			9.91	-10.74	0.96
C12837	C6H7ClO2	3-Chloro-cis-1,2-dihydroxycyclohexa-3,5-diene**	146.572		1.79	6			2						2	1													9.78	-7.31	4.26
C12838	C6H4O4	trans-4-Carboxymethylenebut-2-en-4-olide	140.094		1.79	6				1					2	1					1								9.77	-7.63	3.93
C13273	C20H34O2	Plaunotol	306.483		1.79	20			2						4														10.1	-13.66	-1.76
C13309	C30H44O2	2-Phytyl-1,4-naphthoquinone	436.669		1.79	30	2								5		2												10.3	-16.94	-4.89
C14151	C27H46O2	delta-Tocopherol	402.653		1.79	27									3	1	1	1				1							10.2	-15.69	-3.68
C14152	C28H48O2	beta-Tocopherol	416.68		1.79	28									3	1	1	1				1							10.2	-16.13	-4.1
C14153	C29H44O2	alpha-Tocotrienol	424.659		1.79	29									6	1	1	1				1							10.2	-16.87	-4.84
C14154	C28H42O2	beta-Tocotrienol	410.632		1.79	28									6	1	1	1				1							10.2	-16.43	-4.41
C14155	C28H42O2	gamma-Tocotrienol	410.632		1.79	28									6	1	1	1				1							10.2	-16.43	-4.41
C14156	C27H40O2	delta-Tocotrienol	396.605		1.79	27									6	1	1	1				1							10.2	-15.99	-3.99
C14419	C6H5Cl2N	2,4-Dichloroaniline	162.017		1.79	6											1								1				9.83	-4.17	7.45
C14450	C6H6ClN	4-Chloroaniline	127.572		1.79	6											1										1		9.72	-4.93	6.58
C14463	C6H10O4	(R)-3-Hydroxy-3-methyl-2-oxopentanoate	146.141		1.79	6	1		1	1																			9.78	-9.39	2.18
C14582	C8H10O	2,4-Dimethylphenol	122.164		1.79	8											1	1											9.71	-6.34	5.16
C15547	C32H42N7O19P3S	1,4-Dihydroxy-2-naphthoyl-CoA	953.698		1.79	32	1		1	1			3		6	1	4	2			1	1		1	2		2		10.6	-42.94	-30.55
C15882	C27H46O2	2-Methyl-6-phytylquinol	402.653		1.79	27									4		1	2											10.2	-17.24	-5.23
C15883	C28H48O2	2,3-Dimethyl-5-phytylquinol	416.68		1.79	28									4		1	2											10.2	-17.68	-5.65
C15972	C8H14NOS2R	Enzyme N6-(lipoyl)lysine	334.5		1.79	8	1									1									1				10.1	-5.32	6.61
C15973	C8H16NOS2R	Enzyme N6-(dihydrolipoyl)lysine	336.5		1.79	8	1																		1				10.1	-5.31	6.63
C16138	C12H21N3O3	L-Pyrrolysine;	255.313		1.79	12	1			1						1								1	1	1			10	-12.27	-0.45
C16143	C15H26O	germacradienol	222.366		1.79	15			1						2	1													9.97	-9.04	2.72
C16181	C6H7Cl5O	beta-2,3,4,5,6-Pentachlorocyclohexanol	272.384		1.79	6			1							1													10.1	-4.88	6.96
C16182	C6H8Cl4O2	beta-2,3,5,6-Tetrachloro-1,4-cyclohexanediol	253.939		1.79	6			2							1													10	-7.11	4.7
C16255	C10H18NO2S2R	S-Acetyldihydrolipoamide-E	249.4		1.79	10	1		1												1				1			rsh as oh gorup	10	-9.62	2.19
C16266	C6H5ClO4	3-Chloro-2-hydroxymuconic semialdehyde	176.554		1.79	6		1	1	1					2														9.87	-10	1.66
C16286	C12H22O	(-)-geosmin	182.303		1.79	12			1							2													9.88	-7.53	4.14
C16519	C14H16O9	2-Succinyl-5-enolpyruvyl-6-hydroxy-3-cyclohexene-1-carboxylate	328.271		1.79	14	1		1	3					2	1						1							10.1	-20.96	-9.04
C16521	C5H8	2-Methyl-1,3-butadiene, Isoprene	68.117		1.79	5									2														9.45	-2.4	8.84
C16523	C40H47NO12	3'-N-Debenzoyl-2'-deoxytaxol	733.801		1.79	40	1		2						7	4	2				4			1				phenols?	10.5	-30.91	-18.64
C16524	C40H47NO13	3'-N-Debenzoyltaxol	749.8		1.79	40	1		3						7	4	2				4			1					10.5	-33.14	-20.86
C16695	C53H82O2	Plastoquinol-9	751.217		1.79	53									12		1	2											10.5	-29.48	-17.2
C16999	C19H18N4O7	Futalosine	414.369		1.79	19	2		2	1					4	1	3					1			1	1	1		10.2	-24.47	-12.45
C17010	C14H16O7	Dehypoxanthine futalosine	296.273		1.79	14	1		3	1					3	1	1					1							10.1	-19.04	-7.16
C17017	C14H14O7	Cyclic dehypoxanthine futalosine	294.257		1.79	14	1		3	1					3	2	1					1							10.1	-19.05	-7.18
C17018	C11H8O4	1,4-Dihydroxy-6-naphthoate	204.179		1.79	11				2					5		2	2											9.93	-18.14	-6.42
C17412	C16H16O5	Shikonin	288.295		1.79	16	2		1						5	1	1	2											10.1	-16.62	-4.75
C17530	C3H6O2	Methyl acetate	74.0785		1.79	3															1								9.49	-2.52	8.76
C17554	C12H14O4(C5H8)n	3,4-Dihydroxy-5-polyprenylbenzoate	834.653		1.79	17																							10.5	-7.48	4.85
C17570	C52H80O2	2-Methyl-6-solanyl-1,4-benzoquinol	737.19		1.79	52									5		1	2											10.5	-28.34	-16.06
C17621	C10H18O2	(6E)-8-Hydroxygeraniol	170.249		1.79	10			2						2														9.85	-9.06	2.58
C17622	C10H14O2	(6E)-8-Oxogeranial	166.217		1.79	10		2							2														9.84	-7.3	4.33
C18015	C20H26O3	Momilactone A	314.419		1.79	20	1								2	4					1								10.1	-11.18	0.73
C18016	C20H28O3	3beta-Hydroxy-9beta-pimara-7,15-diene-19,6beta-olide	316.435		1.79	20			1						2	4					1								10.1	-12.47	-0.56
C18025	C10H14O	(+)-Menthofuran	150.218		1.79	10									2	2						1							9.8	-5.3	6.28
C18027	C10H18O2	(4R,7S)-7-Isopropyl-4-methyloxepan-2-one	170.249		1.79	10										1					1	1						ether counting twice?	9.85	-6.29	5.35
C18131	C17H22O3	Geranyl-hydroxybenzoate	274.355		1.79	17				1					5		1	1											10.1	-14.38	-2.53
C18132	C16H22O3	3''-Hydroxy-geranylhydroquinone	262.344		1.79	16			1						5		1	2											10	-14.73	-2.9
C18133	C16H16O4	Deoxyshikonin	272.296		1.79	16	2								5		2	2											10.1	-15.06	-3.22
C18134	C16H18O3	Dihydroechinofuran	258.312		1.79	16	2								4	2						1							10	-10.02	1.8
C18135	C16H20O3	Dihydroshikonofuran	260.328		1.79	16									5	1	1	2				1							10	-13.19	-1.37
C18211	C20H32	Isopimara-7,15-diene	272.468		1.79	20									2	3													10.1	-9.03	2.81
C18219	C20H32O	Palustradienol	288.467		1.79	20			1						2	3													10.1	-11.26	0.61
C18220	C20H30O	Palustradienal	286.452		1.79	20		1							2	3													10.1	-10.38	1.49
C18221	C20H32O	Isopimaradienol	288.467		1.79	20			1						2	3													10.1	-11.26	0.61
C18222	C20H30O	Isopimaradienal	286.452		1.79	20		1							2	3													10.1	-10.38	1.49
C18223	C20H32	Stemar-13-ene	272.468		1.79	20									1	4													10.1	-8.94	2.9
C18224	C20H32	Stemod-13(17)-ene	272.468		1.79	20									1	4													10.1	-8.94	2.9
C18225	C20H32	9beta-Pimara-7,15-diene	272.468		1.79	20									2	3													10.1	-9.03	2.81
C18226	C20H32	ent-Cassa-12,15-diene	272.468		1.79	20									2	3													10.1	-9.03	2.81
C18228	C20H32	ent-Pimara-8(14),15-diene	272.468		1.79	20									2	3													10.1	-9.03	2.81
C18229	C20H32	Fusicocca-2,10(14)-diene	272.468		1.79	20									2	3													10.1	-9.03	2.81
C18236	C6H2Cl4	1,2,3,4-Tetrachlorobenzene	215.892		1.79	6											1												9.95	-3.32	8.42
C18238	C6H4Cl4O2	cis-Chlorobenzene dihydrodiol	249.907		1.79	6			2						2	1													10	-7.31	4.5
C18240	C6H2Cl4O2	Tetrachlorocatechol	247.891		1.79	6											1	2											10	-7.6	4.2
C18241	C6H2Cl4O4	Tetrachloro-cis,cis-muconate	279.89		1.79	6				2					2														10.1	-10	1.86
C18242	C6HCl3O4	2,3,5-Trichlorodienelactone	243.429		1.79	6				1					2	1					1								10	-7.63	4.17
C18243	C6H3Cl3O5	2,3,5-Trichloromaleylacetate	261.444		1.79	6	1			2					1														10	-10.84	0.99
C18244	C6H6Cl2O5	2,4-Dichloro-3-oxoadipate	229.015		1.79	6	1			2																			9.98	-10.74	1.03
C18300	C7H6Cl2	2,4-Dichlorotoluene	161.029		1.79	7											1												9.83	-3.76	7.86
C18301	C7H8Cl2O2	4,6-Dichloro-3-methyl-cis-1,2-dihydroxycyclohexa-3,5-diene	195.043		1.79	7											1	2											9.91	-8.04	3.66
C18302	C7H6Cl2O2	4,6-Dichloro-3-methylcatechol	193.027		1.79	7											1	2											9.9	-8.04	3.65
C18303	C7H6Cl2O4	3,5-Dichloro-2-methylmuconate	225.026		1.79	7				2					2														9.97	-10.44	1.32
C18304	C7H5ClO4	2-Chloro-5-methyl-cis-dienelactone	188.565		1.79	7	1								2							1							9.89	-4.9	6.78
C18305	C7H7ClO5	2-Chloro-5-methylmaleylacetate	206.581		1.79	7	1			2					1														9.93	-11.28	0.44
C18306	C7H8O5	5-Methylmaleylacetate	172.135		1.79	7	1			2					1														9.85	-11.28	0.36
C18307	C7H10O5	2-Methyl-3-oxoadipate	174.151		1.79	7	1			2																			9.86	-11.18	0.47
C18309	C7H5ClO4	3-Chloro-2-methyldienelactone	188.565		1.79	7	1			1					2							1							9.89	-8.48	3.2
C18310	C7H7ClO5	3-Chloro-2-methylmaleylacetate	206.581		1.79	7	1			2					1														9.93	-11.28	0.44
C18311	C7H8O4	4-Methyl-3-oxoadipate-enol-lactone	156.136		1.79	7	1			1					1														9.81	-7.7	3.9
C18312	C7H10O5	4-Methyl-3-oxoadipate	174.151		1.79	7	1			2																			9.86	-11.18	0.47
C18933	C6Cl4O2	Chloranil	245.875		1.79	6	2								2	1													10	-4.73	7.07
C19817	C20H34O	Phyllocladan-16alpha-ol	290.483		1.79	20			1							4													10.1	-11.07	0.8
C20145	C20H32	ent-Isokaurene	272.468		1.79	20									1	4													10.1	-8.94	2.9
C20146	C20H32O	ent-2alpha-Hydroxyisokaurene	288.467		1.79	20			1						1	4													10.1	-11.17	0.7
C20149	C20H30O2	9beta-Pimara-7,15-dien-19-oate	302.451		1.79	20				1					2	3													10.1	-12.61	-0.72
C20150	C20H32O	ent-11beta-Hydroxycassa-12,15-diene	288.467		1.79	20			1						2	3													10.1	-11.26	0.61
C20151	C22H34O4	10beta	362.503		1.79	22			2						2	3					1								10.2	-15.57	-3.6
C20158	C20H34O	(13E)-Labda-7,13-dien-15-ol	290.483		1.79	20			1						2	2													10.1	-11.25	0.62
C20185	C20H32	(12E)-9alpha-Labda-8(17),12,14-triene	272.468		1.79	20									3	2													10.1	-9.12	2.72
C20208	C20H30O2	syn-Stemoden-19-oate	302.451		1.79	20				1					1	4													10.1	-12.52	-0.63
C20221	C10H16O2	(6E)-8-Oxolinalool	168.233		1.79	10		1	1						2														9.84	-8.18	3.45
C20258	C7H9NO5	(2S,4S)-4-Hydroxy-2,3,4,5-tetrahydrodipicolinate	187.15		1.79	7			1	2						1										1			9.89	-13.08	-1.4
C20270	C20H38O8P2	Copal-8-ol diphosphate	468.458		1.79	20			1				2		1	2													10.3	-15.61	-3.53
C20277	C6H14N2O2	(2R,3R)-3-Methylornithine;	146.188		1.79	6				1														2					9.78	-8.24	3.33
C20278	C12H26N4O3	(2R,3R)-3-Methylornithinyl-N6-lysine;	274.36		1.79	12	1			1														3	1				10.1	-13.68	-1.83
C20279	C12H23N3O4	(2R,3R)-3-Methylglutamyl-5-semialdehyde-N6-lysine	273.329		1.79	12	1	1		1														2	1				10.1	-14.02	-2.17
C20481	C20H34O	cis-Abienol	290.483		1.79	20			1						2	2													10.1	-11.25	0.62
C20681	C20H34O	(E,E)-Geranyllinalool	290.483		1.79	20			1						4														10.1	-11.43	0.44
C20700	C16H26	(E,E)-4,8,12-Trimethyltrideca-1,3,7,11-tetraene	218.378		1.79	16									4														9.96	-7.44	4.31
C20711	C20H32	Miltiradiene	272.468		1.79	20									2	3													10.1	-9.03	2.81
C20737	C27H40O2	6-Geranylgeranyl-2-methylbenzene-1,4-diol	396.605		1.79	27									7		1	2											10.2	-17.54	-5.53
C20738	C28H42O2	6-Geranylgeranyl-2,3-dimethylbenzene-1,4-diol	410.632		1.79	28									7		1	2											10.2	-17.98	-5.96
C20772	C10H8O5	3-[(1-Carboxyvinyl)oxy]benzoate	208.167		1.79	10				2					4		1						1						9.94	-13.67	-1.94
C20773	C19H19N5O6	6-Amino-6-deoxyfutalosine	413.384		1.79	19	1		2	1					5	1	3					1		1			2		10.2	-24.8	-12.78
C20783	C3H8	Propane	44.0956		1.79	3																							9.26	-1.32	9.73
C20789	C10H14O4	7-Deoxyloganetate	198.216		1.79	10			1	1					1	2						1							9.92	-11.01	0.69
C20790	C11H16O4	7-Deoxyloganetin	212.242		1.79	11			1						1	2					1	1							9.95	-9.07	2.66
C20943	C10H16O	(R)-Ipsdienol	152.233		1.79	10			1						3														9.8	-6.93	4.66
C20944	C10H14O	Ipsdienone	150.218		1.79	10	1								3														9.8	-5.64	5.95
C21017	C15H25N4O8P2S	2-(alpha-Hydroxypropyl)thiamine diphosphate	483.394		1.79	15			1				2		2	2								1		3			10.3	-16.32	-4.23
C21084	C30H46O2	Demethylphylloquinol	438.685		1.79	30									6		2	2											10.3	-19.44	-7.39
C21103	C6H2Cl2O2	2,6-Dichloro-p-benzoquinone	176.985		1.79	6	2								2	1													9.87	-4.73	6.93
C21104	C6H2Cl2O2	2,5-Dichloro-p-benzoquinone	176.985		1.79	6	1								2	1													9.87	-3.79	7.87
C21105	C6H3ClO3	5-Chloro-2-hydroxy-p-benzoquinone	158.539		1.79	6	2		1						2	1													9.82	-6.96	4.65
C21166	C8H8O2	4-Hydroxy-3-methylbenzaldehyde	136.148		1.79	8		1									1	1											9.75	-7.69	3.85
C21167	C8H8O3	4-Hydroxy-3-methylbenzoate	152.147		1.79	8				1							1	1											9.8	-9.92	1.67
C21168	C8H6O5	4-Hydroxyisophthalate	182.13		1.79	8				2							1	1											9.88	-13.5	-1.83
C21203	C10H19O4P	Geranyl phosphate	234.229		1.79	10							1		2													* phosphate uncertain	9.99	-6.83	4.95
C21250	C7H8O6	2-Methyl-trans-aconitate	188.135		1.79	7				3					1														9.89	-13.92	-2.24
C21373	C5H8O	(3R)-3,4-epoxy-3-methylbut-1-ene	84.116		1.79	5	0	0	0	0			0		1	0	0				0	1							9.54	-2.98	8.35
C21374	C15H24N3O7S	2-(glutathion-S-yl)-2-methylbut-3-en-1-ol	390.43		1.79	15	2	0	1	2			0		1	0	0				0				2				10.2	-19.67	-7.67
C21523	C6H12O6	tagatose 1	180.156		1.79	6	1		5																				9.87	-14.73	-3.07
C21560	C20H32O	ent-Sandaracopimaradien-3beta-ol	288.467		1.79	20			1						2	3													10.1	-11.26	0.61
C21561	C20H32O2	Oryzalexin E	304.467		1.79	20			2						2	3													10.1	-13.49	-1.6
C21562	C20H32O2	Oryzalexin D	304.467		1.79	20			2						2	3													10.1	-13.49	-1.6
C21656	C20H38O8P2	ent-8alpha-Hydroxylabd-13-en-15-yl diphosphate	468.458		1.79	20			1				2		1	2												Hydroxyls	10.3	-15.61	-3.53
C21659	C24H42O21	isomaltose 1	666.578		1.79	24			14							4						6							10.4	-45.92	-33.69
C21709	C20H34O	Nezukol	290.483		1.79	20			1						1	3													10.1	-11.16	0.71
C21714	C20H34O	ent-13-epi-Manoyl oxide	290.483		1.79	20									1	3						1							10.1	-9.61	2.26
C21735	C20H36O7P2	(-)-Kolavenyl diphosphate	450.443		1.79	20							2		2	2													10.3	-13.48	-1.42
C21796	C20H30O2	Hydroxyferruginol	302.451		1.79	20			2						3	2	1												10.1	-14.26	-2.37
C21818	C20H28O4	Carnosic acid	332.434		1.79	20			2	1					3	2	1												10.1	-17.84	-5.91
C21819	C20H30O2	Salviol	302.451		1.79	20			2						3	2	1												10.1	-14.26	-2.37
C21822	C20H28O2	Sugiol	300.435		1.79	20	1		1						3	2	1												10.1	-12.97	-1.08
C21823	C20H28O3	11-Hydroxysugiol	316.435		1.79	20	1		2						3	2	1												10.1	-15.2	-3.29
C21824	C20H28O4	11,20-Dihydroxysugiol	332.434		1.79	20	1		3						3	2	1												10.1	-17.43	-5.5
C21825	C20H32O	9beta-Pimara-7,15-diene-3beta-ol	288.467		1.79	20			1						2	3													10.1	-11.26	0.61
C21826	C20H30O2	ent-3beta-Hydroxycassa-12,15-dien-2-one	302.451		1.79	20	1		1						2	3													10.1	-12.2	-0.31
C21830	C20H30O3	11,20-Dihydroxyferruginol	318.45		1.79	20			3						3	2	1												10.1	-16.49	-4.58
C21831	C20H32O2	ent-2alpha,3alpha-Dihydroxyisokaurene	304.467		1.79	20			2						1	4													10.1	-13.4	-1.51
C22014	C10H16O3	7-Deoxyloganetic alcohol	184.232		1.79	10			2						1	2						1							9.88	-9.66	2.01
C22039	C11H6O4	2-Carboxy-1,4-naphthoquinone	202.163		1.79	11	2			1					4		2												9.92	-12.06	-0.35
C22084	C3H5N3O4	biuret 1	147.089		1.79	3	2			1														1	2				9.79	-9.49	2.09
C22225	C10H16O2	(S)-8-Oxocitronellyl enol	168.233		1.79	10		1	1						2														9.84	-8.18	3.45
CPD-10160	C12H20	(8S,9S,10S)-8,10-dimethyl-1-octalin	164.29		1.79	12									1	2													9.83	-5.4	6.22
CPD-19028	C5H8O	(3R)-3,4-epoxy-3-methylbut-1-ene	84.118		1.79	5									1	1						1							9.54	-2.99	8.34
CPD-19029	C15H24N3O7S	2-(glutathion-S-yl)-2-methylbut-3-en-1-ol	390.43		1.79	15			2	2					1						2					1		2 Amides	10.2	-21.32	-9.32
CPD-19031	C15H22N3O7S	2-(glutathion-S-yl)-2-methylbut-3-enal	388.42		1.79	15		1		2					1						2					1		2 Amides	10.2	-18.21	-6.21
CPD-19032	C15H21N3O8S	2-(glutathion-S-yl)-2-methylbut-3-enoate	403.41		1.79	15				3					1						3					1		sulfide	10.2	-21.64	-9.63
CPD-19033	C26H38N7O17P3S	2-methyl-3-butenoyl-CoA	845.6		1.79	26	3		2				3		2	1						1		1	2		2	sulfide, 2 amides,	10.5	-32.23	-19.9
CPD-9436	C5H8	isoprene	68.118		1.79	5									2														9.45	-2.4	8.84

## Sheet: description
Reference	Explanation
compund ID	compund ID from the KEGG or MetaCyc databases
formula	compound formula
name	compound name
mass	molecular mass
group	name of contribution term group
group (shorthand)	shorthand name of contribution term group
group contribution term:	coefficient that is multiplied by the number of each functional group observed in a given molecule
log(alpha)	term to convert from vapor pressure to mass-based saturation concentration (ug C m-3) using ideal gas law in logarithmic units
log(sum of contribution terms)	sum of contribution terms in logarithmic units
RVI (log C*)	calculated relative volatility index
